# Supplementary material for: Morphology-dependent charge storage performance of Co3O4 nanostructures in an all-solid-state flexible supercapacitor
Source: Royal Society of Chemistry journal article supplement (doi:10.1039/c9nj03070k), 2019-01-01
Supplement: c9nj03070k1.pdf [file c9nj03070k1.pdf]

## Supporting Information

### **Morphology-Dependent Charge Storage Performance of $\text{Co}_3\text{O}_4$ Nanostructures in All-Solid-State Flexible Supercapacitor**

Biraj Kanta Satpathy,<sup>1</sup> Arpan Kumar Nayak,<sup>2</sup> C. Retna Raj,<sup>1,3</sup> and Debabrata Pradhan<sup>1,2</sup>

<sup>1</sup>*School of Nanoscience and Technology, Indian Institute of Technology Kharagpur, Kharagpur  
721 302, India*

<sup>2</sup>*Materials Science Centre, Indian Institute of Technology Kharagpur, Kharagpur 721 302,  
India*

<sup>3</sup>*Department of Chemistry, Indian Institute of Technology Kharagpur, Kharagpur 721 302,  
India*

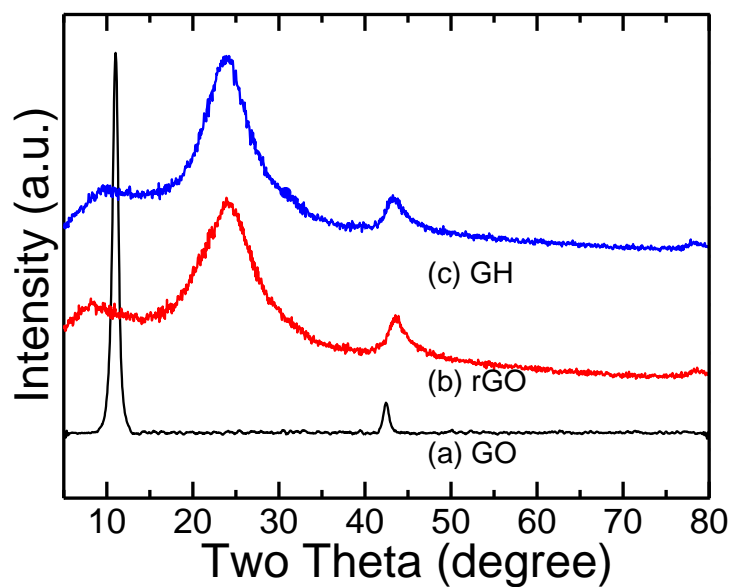

**Fig. S1.** Powder XRD patterns of (a) GO, (b) rGO, and (c) GH. The rGO and GH was obtained by hydrothermal treatment of GO in aqueous solution at 120 and 150 °C for 12 h, respectively.

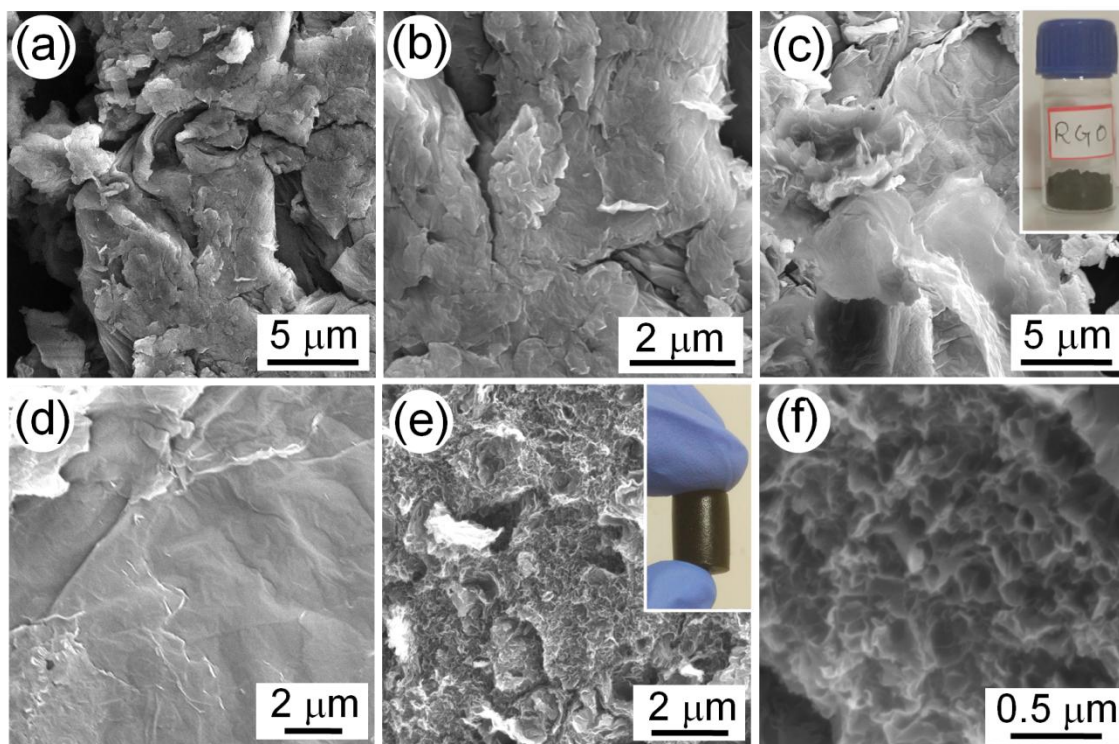

**Fig. S2.** FESEM images of the as-synthesized (a,b) GO, (c,d) rGO, and (e,f) GH. Insets of (c) and (e) show photographs of the corresponding product.

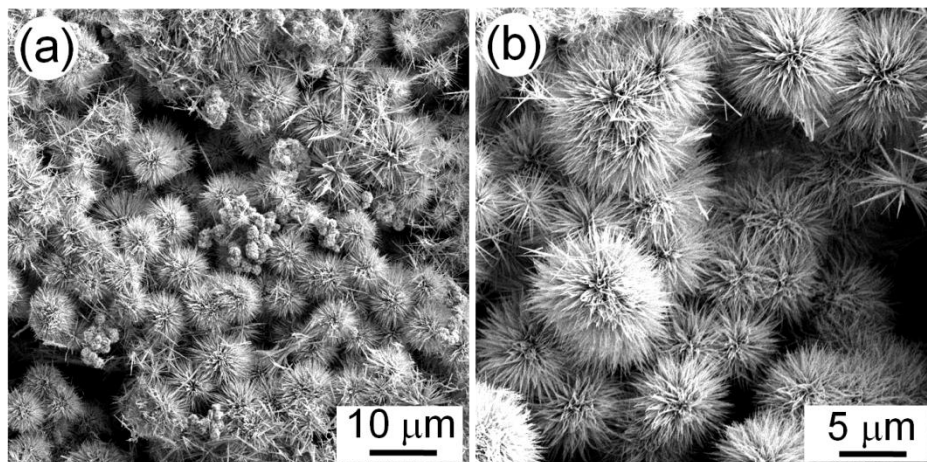

**Fig. S3.** FESEM images of the as-synthesized product at low magnifications obtained by microwave-assisted hydrothermal method at 120 °C.

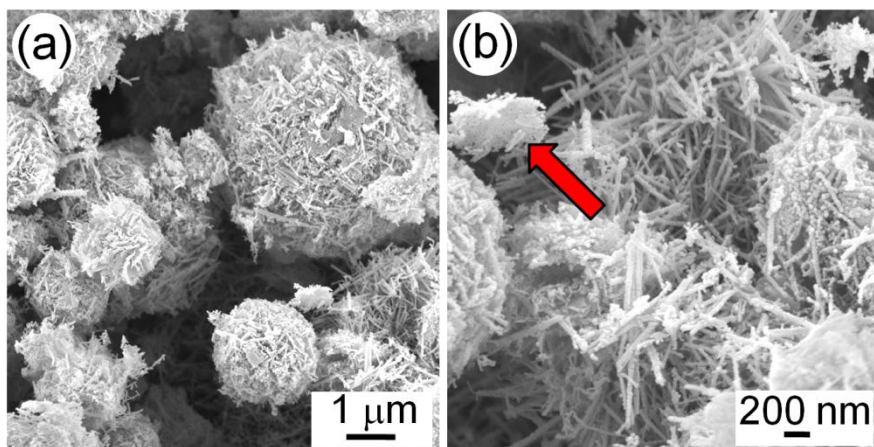

**Fig. S4.** FESEM images of the as-synthesized product obtained by microwave-assisted hydrothermal method at 150 °C. The red color arrow mark in (b) indicates 2D flake-like structure.

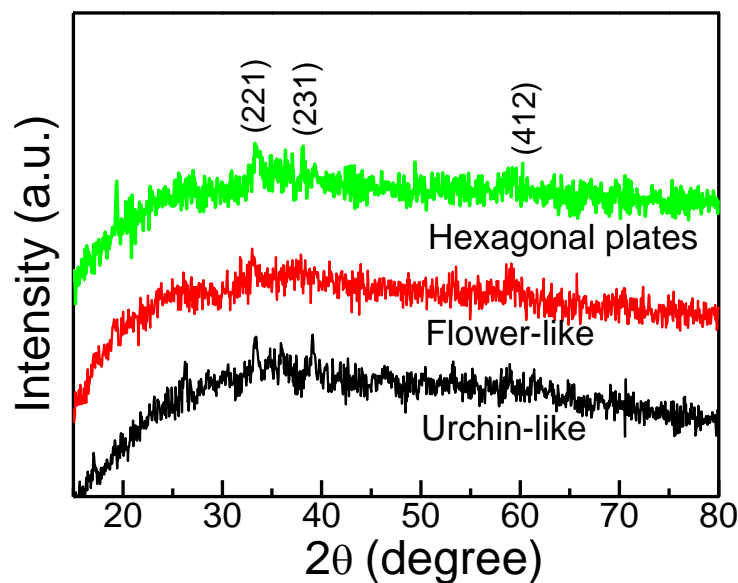

**Fig. S5.** Powder XRD patterns of the as-synthesized products obtained by varying the reaction temperature to form different shapes such as urchin-like (120 °C), flower-like (180 °C) and hexagonal plates (200 °C) with other reaction parameters fixed, i.e., 250 W for 30 min and cobalt and urea molar concentration at 0.1 M. The XRD pattern is matched with JCPDS file 48-0083 for cobalt carbonate hydroxide hydrate  $[\text{Co}(\text{CO}_3)_{0.5}(\text{OH})\cdot 0.11\text{H}_2\text{O}]$

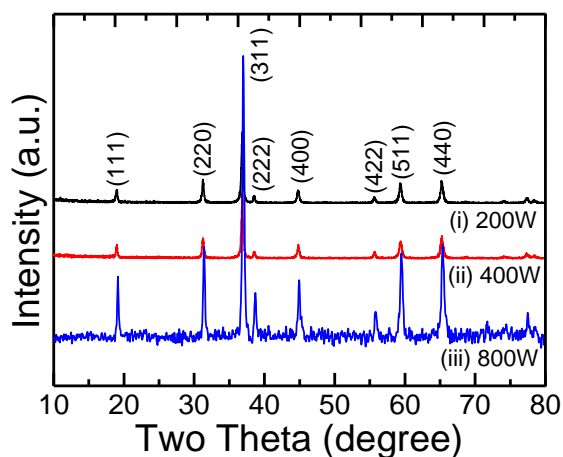

**Fig. S6.** Powder XRD patterns of the products obtained by varying the microwave power and then annealed at 500 °C under air for 3 h.

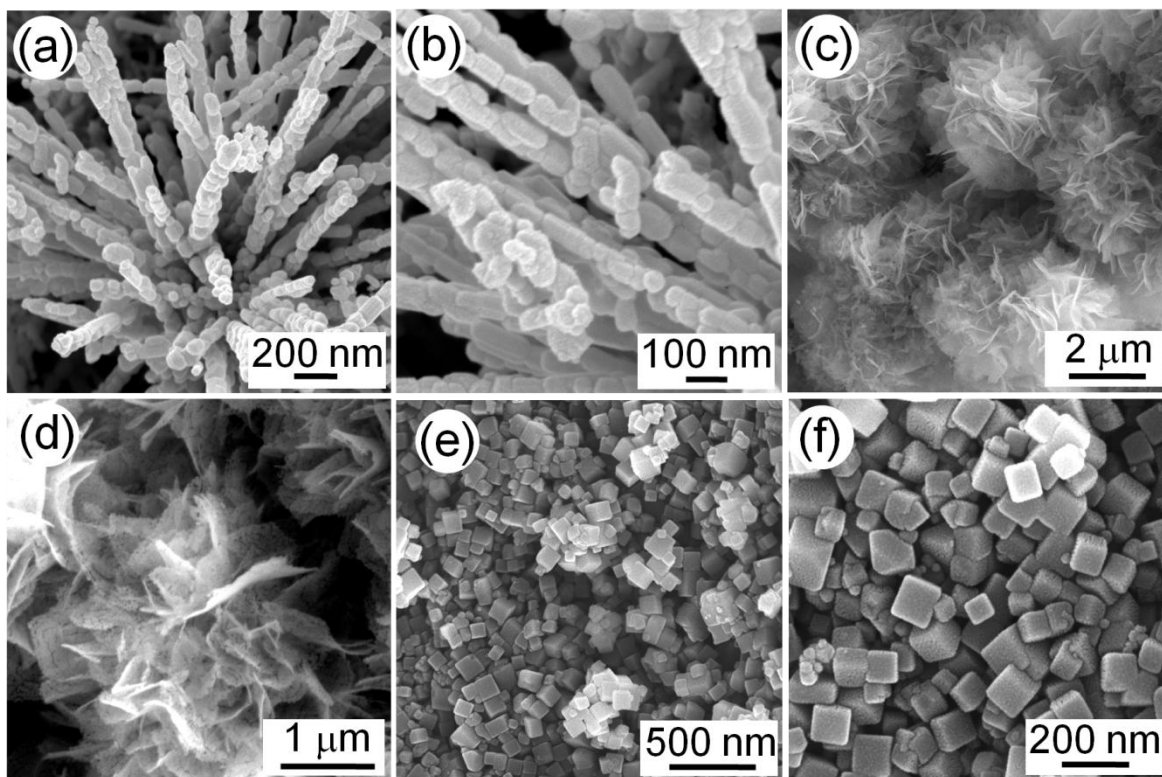

**Fig. S7.** FESEM images of the samples annealed at 500 °C for 3 h. These samples were synthesized by microwave-assisted hydrothermal method by varying the reaction temperature (a,b) 120 °C and (c,d) 180 °C (0.1 M precursors, 400 W 30 min). The images shown in (e,f) were synthesized at 0.01 M precursors at 400 W and 180 °C for 30 min.

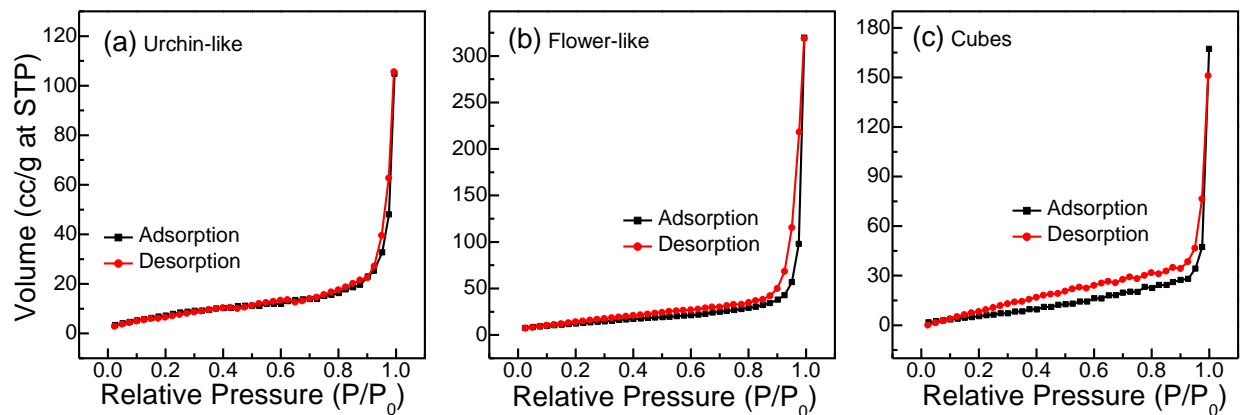

**Fig. S8.** The  $N_2$  adsorption-desorption isotherms of (a) urchin-like, (b) flower-like, and (c) cube morphology of  $Co_3O_4$ .

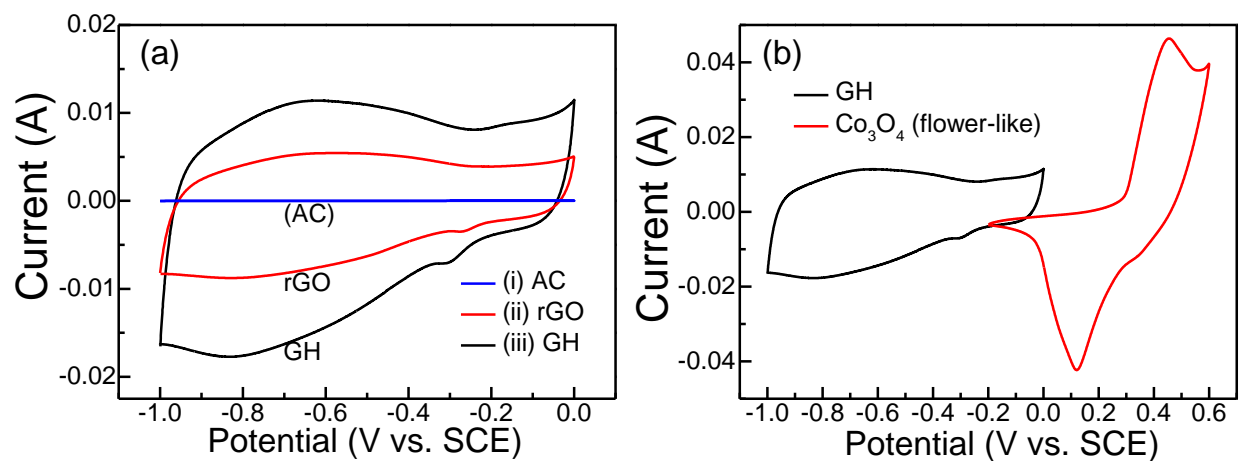

**Fig. S9.** (a) Cyclic voltammograms of (i) AC, (ii) rGO, and (iii) GH at  $10 \text{ mV s}^{-1}$ . (b) Cyclic voltammograms of GH and flower-like  $Co_3O_4$  in different potential windows.

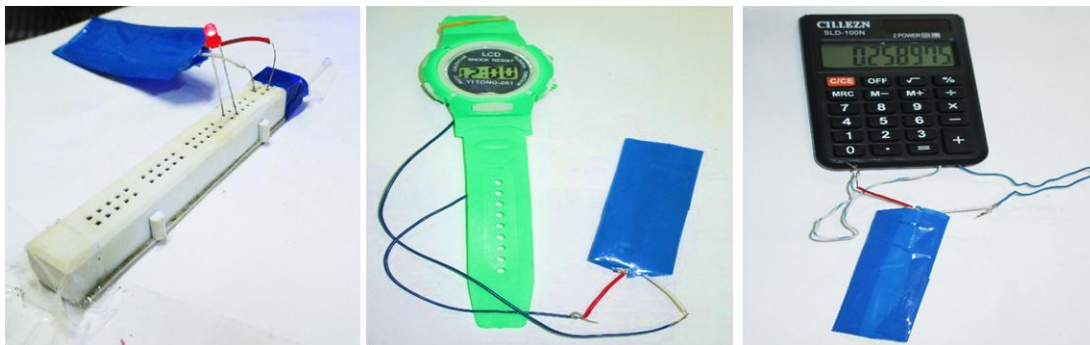

**Fig. S10.** Photographs on powering small devices using the fabricated  $\text{Co}_3\text{O}_4//\text{GH}$  ASC device.

Table S1. Comparison on the Supercapacitor Performance of the Reported  $\text{Co}_3\text{O}_4$  based Materials

| <i>Electrode Material</i>                        | <i>Synthesis Process</i> | <i>Electrolyte</i>            | <i><math>C_s</math> from CV</i>                   | <i><math>C_s</math> from GCD</i>                  | <i>Energy Density</i>      | <i>Power Density</i>      | <i>Ref</i>   |
|--------------------------------------------------|--------------------------|-------------------------------|---------------------------------------------------|---------------------------------------------------|----------------------------|---------------------------|--------------|
| $\text{Co}_3\text{O}_4$                          | Microwave Hydrothermal   | 2 M KOH                       | $782.5 \text{ F g}^{-1}$ at $5 \text{ mV s}^{-1}$ | $341.5 \text{ F g}^{-1}$ ( $1 \text{ A g}^{-1}$ ) | $29 \text{ Wh kg}^{-1}$    | $916 \text{ W kg}^{-1}$   | This work    |
| $\text{CoO}/\text{Co}_3\text{O}_4$               | Hydrothermal             | 3 M KOH                       | $436 \text{ F g}^{-1}$ at $5 \text{ mV s}^{-1}$   | $451 \text{ F g}^{-1}$ at $1 \text{ A g}^{-1}$    | $10.52 \text{ Wh kg}^{-1}$ | $140 \text{ W g}^{-1}$    | <sup>1</sup> |
| $\text{Co}_3\text{O}_4$                          | Laser ablation           | 0.5 M $\text{H}_3\text{PO}_4$ | $177 \text{ F g}^{-1}$ at $1 \text{ mV s}^{-1}$   | $172 \text{ F g}^{-1}$ at $0.9 \text{ A g}^{-1}$  | $3.01 \text{ Wh kg}^{-1}$  | $0.031 \text{ kW g}^{-1}$ | <sup>2</sup> |
| $\text{rGO}@ \text{Co}_3\text{O}_4$              | Co-precipitation         | 6 M KOH                       |                                                   | $546 \text{ F g}^{-1}$ at $1 \text{ A g}^{-1}$    |                            |                           | <sup>3</sup> |
| $\text{CoO}$ nanopillar                          | Hydrothermal             | 2 M KOH                       | $510 \text{ F g}^{-1}$ at $5 \text{ mV s}^{-1}$   | $354 \text{ F g}^{-1}$ at $1 \text{ A g}^{-1}$    | $21.25 \text{ Wh kg}^{-1}$ | $225 \text{ W kg}^{-1}$   | <sup>4</sup> |
| $\text{Co}_3\text{O}_4$ -rGO                     | Electrodeposition        | 1 M KOH                       |                                                   | $406 \text{ F g}^{-1}$ at $1 \text{ A g}^{-1}$    | $23.3 \text{ Wh kg}^{-1}$  | $2.3 \text{ kW kg}^{-1}$  | <sup>5</sup> |
| $\text{AuNP}/\text{nan o-}\text{Co}_3\text{O}_4$ | In situ reduction        | 2 M KOH                       |                                                   | $681 \text{ F g}^{-1}$ at $0.5 \text{ A g}^{-1}$  | $25 \text{ Wh kg}^{-1}$    |                           | <sup>6</sup> |
| $\text{Co}_3\text{O}_4$ -n-rGO                   | Hydrothermal             | 6 M KOH                       |                                                   |                                                   | $3.5 \text{ Wh kg}^{-1}$   | $7 \text{ kW kg}^{-1}$    | <sup>7</sup> |
| $\text{Co}_3\text{O}_4@ \text{N rGO}$            | Hydrothermal             | 2 M KOH                       |                                                   | $450 \text{ F g}^{-1}$ at $1 \text{ A g}^{-1}$    |                            |                           | <sup>8</sup> |

## References

- <sup>1</sup> M. Pang, G. Long, S. Jiang, Y. Ji, W. Han, B. Wang, X. Liu, Y. Xi, D. Wang, and F. Xu, *Chem. Eng. J.*, 2015, **280**, 377–384.
- <sup>2</sup> X. Y. Liu, Y. Q. Gao, and G. W. Yang, *Nanoscale* 2016, **8**, 4227–4235.
- <sup>3</sup> D. Yin, G. Huang, Q. Sun, Q. Li, X. Wang, D. Yuan, C. Wang, and L. Wang, *Electrochim. Acta* 2016, **215**, 410–419.
- <sup>4</sup> Y.-B. Liu, L.-Y. Lin, Y.-Y. Huang, and C.-C. Tu, *J. Power Sources*, 2016, **315**, 23–34.
- <sup>5</sup> M. Qorbani, T.-C. Chou, Y.-H. Lee, S. Samireddi, N. Naseri, A. Ganguly, A. Esfandiar, C.-H. Wang, L.-C. Chen, K.-H. Chen, and A. Z. Moshfegh, *J. Mater. Chem. A*, 2017, **5**, 12569–12577.
- <sup>6</sup> Y. Tan, Y. Liu, L. Kong, L. Kang, and F. Ran, *J. Power Sources*, 2017, **363**, 1–8.
- <sup>7</sup> S. Kalasina, N. Phattharasupakun, M. Suksomboon, K. Kongsawatvoragul, and M. Sawangphruk, *Electrochim. Acta*, 2018, **283**, 1125–1133.
- <sup>8</sup> R. Atchudan, T. N. J. I. Edison, D. Chakradhar, N. Karthik, S. Perumal, and Y. R. Lee, *Ceram. Int.*, 2018, **44**, 2869–2883.
